# Supplementary material
Source: PubMed Central journal article supplement (PMC6729132)
Supplement: NIHMS1048521-supplement-Appendix_A.pdf [file NIHMS1048521-supplement-Appendix_A.pdf]

**SUPPLEMENTARY MATERIAL**  
**APPENDIX A**  
**Sample Characteristics for the Surveys**

| Respondent Characteristics                  | Survey Fielded in: |                 |                   | U.S. Population    |
|---------------------------------------------|--------------------|-----------------|-------------------|--------------------|
|                                             | 2010<br>(n=849)    | 2014<br>(n=787) | 2015<br>(n=1,457) | 2010               |
| <b><i>Socio-Demographics</i></b>            |                    |                 |                   |                    |
| Age                                         |                    |                 |                   |                    |
| <30                                         | 10.6%              | 17.3%           | 15.1%             | 23.1% <sup>a</sup> |
| 30-44                                       | 37.7%              | 30.0%           | 22.9%             | 24.1%              |
| 45-60                                       | 38.3%              | 28.5%           | 29.7%             | 25.1%              |
| >60                                         | 13.4%              | 24.1%           | 32.3%             | 27.7%              |
| Gender                                      |                    |                 |                   |                    |
| Female                                      | 50.1%              | 50.9%           | 52.9%             | 51.1%              |
| Male                                        | 49.9%              | 49.1%           | 47.1%             | 48.9%              |
| Race/Ethnicity                              |                    |                 |                   |                    |
| White                                       | 73.9%              | 71.4%           | 76.2%             | 69.6% <sup>a</sup> |
| African American                            | 10.8%              | 10.1%           | 7.8%              | 11.2%              |
| Latino                                      | 8.7%               | 10.4%           | 10.2%             | 12.7%              |
| Other                                       | 6.6%               | 8.1%            | 5.8%              | 6.5%               |
| Education                                   |                    |                 |                   |                    |
| High School or Less                         | 38.9%              | 31.3%           | 33.8%             | 44.1% <sup>a</sup> |
| Some College                                | 28.6%              | 31.1%           | 28.4%             | 25.9%              |
| College Graduate                            | 32.5%              | 37.6%           | 37.9%             | 29.9%              |
| <b><i>Health Status and Utilization</i></b> |                    |                 |                   |                    |
| Chronic Health Problems                     |                    |                 |                   |                    |
| Yes                                         | 39.9%              | 44.5%           | 44.6%             | 45.7% <sup>b</sup> |
| Self-Reported Health                        |                    |                 |                   |                    |
| Fair/Poor                                   | 15.0%              | 13.1%           | 12.5%             | 12.9% <sup>c</sup> |
| Good                                        | 35.3%              | 33.8%           | 36.5%             | 26.7%              |
| Very Good/Excellent                         | 49.2%              | 53.1%           | 50.9%             | 60.3%              |

**Sources**

<sup>a</sup> U.S. Census, Statistical Abstract of the United States: 2012 (Washington DC: U.S. Department of Commerce).

<sup>b</sup> Ward BW, Schiller JS, Goodman RA. Multiple Chronic Conditions Among US Adults: A 2012 Update. *Prev Chronic Dis* 2014;11:E62.

<sup>c</sup> Blackwell DL, Lucas JW, Clarke TC. Summary health statistics for U.S. adults: national health interview survey, 2012. *Vital Health Stat* 10. 2014 Feb;(260):1-161.

## APPENDIX B

### Types of Quality Information Encountered Through Active and Passive Exposure 2014-2015

Percent of Respondents  
(age 25-64 only)

| Type of MD Quality Information Seen<br>In Past 12 Months | Passive Consumers |      | Active Information Seekers* |       |
|----------------------------------------------------------|-------------------|------|-----------------------------|-------|
|                                                          | 2014              | 2015 | 2014                        | 2015  |
| Patient experience measures                              | 1.9%              | 3.6% | 60.0%                       | 52.4% |
| Clinical quality metrics                                 | 2.2%              | 3.8% | 25.2%                       | 26.7% |
| Patient safety metrics                                   | 0.0%              | 1.2% | 12.1%                       | 10.6% |
| Patient comments                                         | 2.2%              | 4.9% | 69.6%                       | 67.8% |
| Any quality information identified above                 | 4.5%              | 7.9% | 86.1%                       | 84.9% |
| Saw at least one quantified metric                       | 3.9%              | 6.3% | 72.2%                       | 62.3% |
| Saw comments only                                        | 0.7%              | 1.7% | 13.9%                       | 22.6% |

**Notes:** Calculated by the authors from their own surveys

\* Reported seeking information on MD quality from the internet in previous 12 months.

**APPENDIX C**

**Consumer Attributes Associated with Actively Seeking Clinician Quality Information**

**Logistic Regression Results: Combined 2014-2015 Sample  
Odd-Ratios, All Ages 18+**

| EXPLANATORY VARIABLES                    | Searched for Physician Quality Information |
|------------------------------------------|--------------------------------------------|
|                                          |                                            |
| High School or Less (Comparison)         |                                            |
| Some College                             | 0.71 *                                     |
| College Grad+                            | 1.18                                       |
| Income                                   | 1.08                                       |
| Age                                      | 0.79 *                                     |
| Female                                   | 1.43 *                                     |
| White (Comparison)                       |                                            |
| Black                                    | 1.66 *                                     |
| Latino                                   | 1.38 *                                     |
| Mixed/Other                              | 1.57 *                                     |
| Healthy (Comparison)                     |                                            |
| Acute Condition                          | 1.16                                       |
| Chronic Condition                        | 1.61 *                                     |
| No Physician Quality Report (Comparison) |                                            |
| Physician Quality Report                 | 0.89                                       |
| 2015 Sample (Comparison)                 |                                            |
| 2014 Sample                              | 0.56 *                                     |
| Percent of Variance Explained            | 0.08                                       |
| Number of Observations                   | 2,243                                      |

\* Statistically significant p<0.05
